# Supplementary material
Source: PubMed Central journal article supplement (PMC3215028)
Supplement: 1110731108_pnas.201110731SI.pdf [file 1110731108_pnas.201110731SI.pdf]

# Supporting Information

Henikoff et al. 10.1073/pnas.1110731108

## SI Experimental Procedures

**Modified Solexa Library Protocol.** The standard Illumina paired-end library preparation protocol (Illumina # PE-930–1001) is used except as follows: (i) All Qiagen clean-up steps and gel purifications are omitted. (ii) Phenol/chloroform extraction is used to stop reactions followed by S300 (or S200) spin column cleanup and Speed-vac volume reduction. (iii) Ampure XP bead steps following adapter ligation and PCR remove excess adapters and primers, respectively. (iv) Reaction volumes are 50  $\mu\text{L}$ , except for the PCR amplification step, where the volume is 10–40  $\mu\text{L}$ , using the same concentrations as recommended by Illumina. (v) Low-retention 1.5-mL (siliconized) microfuge tubes are used throughout, minimizing tube transfers to reduce losses. Enzymes are from the Illumina PE-930–1001 kit or are purchased from standard suppliers, such as New England Biolabs. The following protocol is for eight samples and has been used for 20- to 800-ng starting DNA from micrococcal nuclease (MNase) digested chromatin (based on Quant-it Picogreen fluorescence with RNase added).

### Step 1.

End repair (total 50  $\mu\text{L}$ ):

- 20  $\mu\text{L}$  DNA sample
- 18.5  $\mu\text{L}$  water
- 5  $\mu\text{L}$  T4 ligase buffer with 10 mM ATP
- 2  $\mu\text{L}$  dNTP mix (10 mM each)
- 1.5  $\mu\text{L}$  T4 DNA Pol (5 U/ $\mu\text{L}$ )
- 0.5  $\mu\text{L}$  Klenow fragment (5 U/ $\mu\text{L}$ )
- 2.5  $\mu\text{L}$  T4 PNK (10 U/ $\mu\text{L}$ )

Master mix (add 11.5  $\mu\text{L}$  to 38.5  $\mu\text{L}$  DNA):

- 42  $\mu\text{L}$  T4 ligase buffer with 10 mM ATP
  - 16.8  $\mu\text{L}$  dNTP mix (10 mM each)
  - 12.6  $\mu\text{L}$  T4 DNA Pol (5 U/ $\mu\text{L}$ )
  - 4.2  $\mu\text{L}$  Klenow fragment (5 U/ $\mu\text{L}$ )
  - 21  $\mu\text{L}$  T4 PNK (10 U/ $\mu\text{L}$ )
- 20 °C 30 min at 20 °C (ice bucket and thermometer “water bath”)

Add 50  $\mu\text{L}$  phenol/chloroform/isoamyl (25:24:1, OmniPur cat. #6805), vortex, spin, and remove most organic matter from the bottom. When decanting the aqueous layer, touch the tip to the tube wall to drain remaining organic matter.

Apply the aqueous layer to an S-300 spin column (prespun 1 min at 750  $\times$  g, GE Healthcare).

Spin 2 min at 3,000 rpm.

Reduce volume to 35  $\mu\text{L}$  in Speedvac (no heat). This takes ~15 min.

### Step 2.

Add 3' A overhang (total 50  $\mu\text{L}$ ):

- 35  $\mu\text{L}$  end-repaired DNA sample
- 5  $\mu\text{L}$  10 $\times$  NEB Buffer 2
- 10  $\mu\text{L}$  1 mM dATP
- 0.3  $\mu\text{L}$  Klenow exo- (50 U/ $\mu\text{L}$ )

Master mix (add 15  $\mu\text{L}$  to 35  $\mu\text{L}$  DNA):

- 42  $\mu\text{L}$  10 $\times$  NEB Buffer 2
- 84  $\mu\text{L}$  1 mM dATP
- 2.5  $\mu\text{L}$  Klenow exo- (50 U/ $\mu\text{L}$  New England Biolabs cat. #M0212M)

37°C 30 min.

Extract with 50  $\mu\text{L}$  Phenol/Chloro/isoamyl and S-300 clean-up.

Reduce volume to 18  $\mu\text{L}$  in Speedvac (no heat). This takes ~30 to 45 min.

### Step 3.

Ligate adapters (total 50  $\mu\text{L}$ ):

- 18  $\mu\text{L}$  3'A-extended DNA sample
- 2  $\mu\text{L}$  Illumina PE Adapter mix
- 25  $\mu\text{L}$  Enzymatics Rapid DNA ligase buffer 2 $\times$
- 5  $\mu\text{L}$  Enzymatics DNA Ligase (600 U/ $\mu\text{L}$ )

Add 2  $\mu\text{L}$  Illumina adapters to each DNA sample.

Note: Adjust adapter amount to give an estimated 10:1 adapter:insert molar ratio.

Ligase mix (add 30  $\mu\text{L}$  to 20  $\mu\text{L}$  DNA + adapters):

- 210  $\mu\text{L}$  Rapid DNA Ligase Buffer 2 $\times$
  - 42  $\mu\text{L}$  Enzymatics DNA Ligase (600 U/ $\mu\text{L}$ )
- Incubate 20 °C for 15 min.

### Step 4.

Purify on Ampure XP magnetic beads (Agencourt):

Add 90- $\mu\text{L}$  bead slurry, pipetting up and down 10 $\times$ , total 5 min.

Place in magnetic tube holder. After 2 min, aspirate off the solution.

When still on the magnet, add 200  $\mu\text{L}$  70% EtOH, 30 s, aspirate off. Repeat.

Let dry a few minutes ( $\leq 5$  min), remove from magnet.

Disperse in 40  $\mu\text{L}$  0.1  $\times$  TE8 (1  $\times$  TE8 = 10 mM Tris pH8, 1 mM EDTA); place in magnetic tube holder. Pull off the solution to a fresh tube.

### Step 5.

PCR.

Volume = 10–40  $\mu\text{L}$  (aliquot or entire sample  $\pm$  Speed-vac reduction). Per 10  $\mu\text{L}$ :

- 6.7  $\mu\text{L}$  Ampure purified DNA
- 2  $\mu\text{L}$  5 $\times$  Phusion buffer
- 0.8  $\mu\text{L}$  2.5mM dNTP
- 0.2  $\mu\text{L}$  Illumina Primer 1.0
- 0.2  $\mu\text{L}$  Illumina Primer 2.0
- 0.1  $\mu\text{L}$  Phusion polymerase (Finnzymes)

Master mix (add 3.3  $\mu\text{L}$  to 6.7  $\mu\text{L}$  DNA):

- 16.8  $\mu\text{L}$  5 $\times$  Phusion buffer
- 6.8  $\mu\text{L}$  2.5 mM dNTP
- 1.8  $\mu\text{L}$  Illumina Primer 1.0
- 1.8  $\mu\text{L}$  Illumina Primer 2.0
- 0.9  $\mu\text{L}$  Phusion polymerase

Cycling (SHPCR60 12–18 cycles):

- 98 °C 30 s
- 98 °C 10 s
- 65 °C 30 s
- 60 °C 30 s

Go to cycle 2, repeat 17 $\times$

60 °C 5 min

8 °C forever.

### Step 6.

Perform Ampure clean-up of PCR samples, adding 18- $\mu\text{L}$  Ampure beads, transferring to a 1.5-mL tube for the purification, as above, and eluting with 40  $\mu\text{L}$  0.1  $\times$  TE8. Check on a 2% agarose gel with ethidium bromide added.



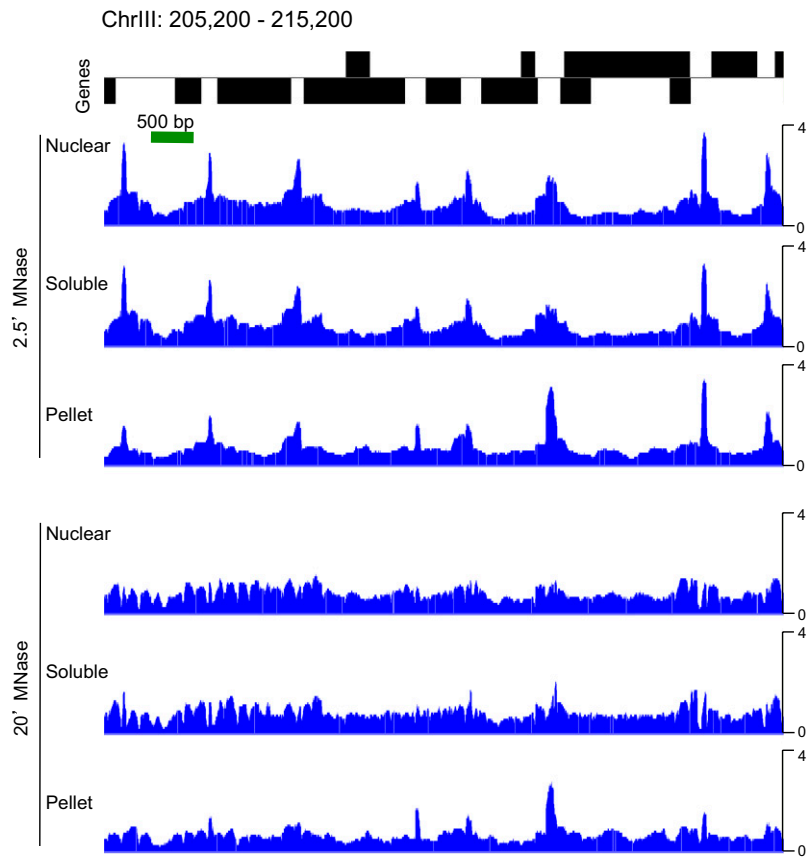

**Fig. S2.** Typical landscapes for soluble and insoluble chromatin are similar. The same region shown in Fig. 2 for size classes of nuclear DNA is shown here for all reads from nuclear, soluble, and pellet DNA. This comparison indicates that the large majority of the genome is accurately represented in the soluble fraction, although a few quantitative differences are seen. The y axis is normalized counts derived from the following total number of mapped paired-end reads: nuclear (~25 million), soluble (~25 million), pellet (~10 million).

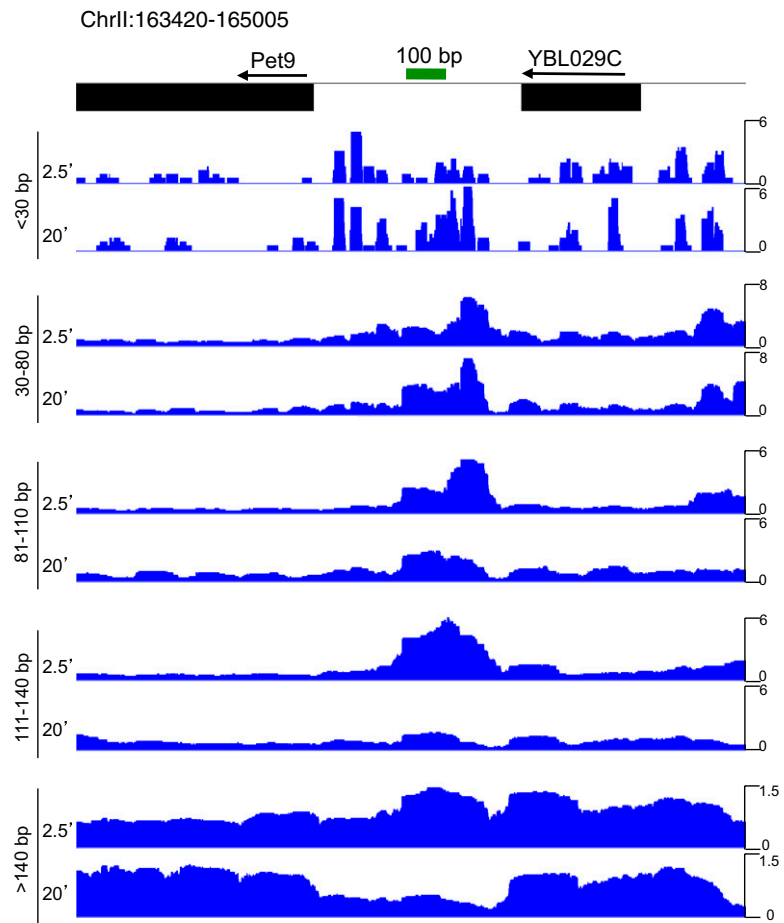

**Fig. S3.** An intergenic region that shows nucleosome eviction and small particle enrichment. See the legend to Fig. 3A for details.







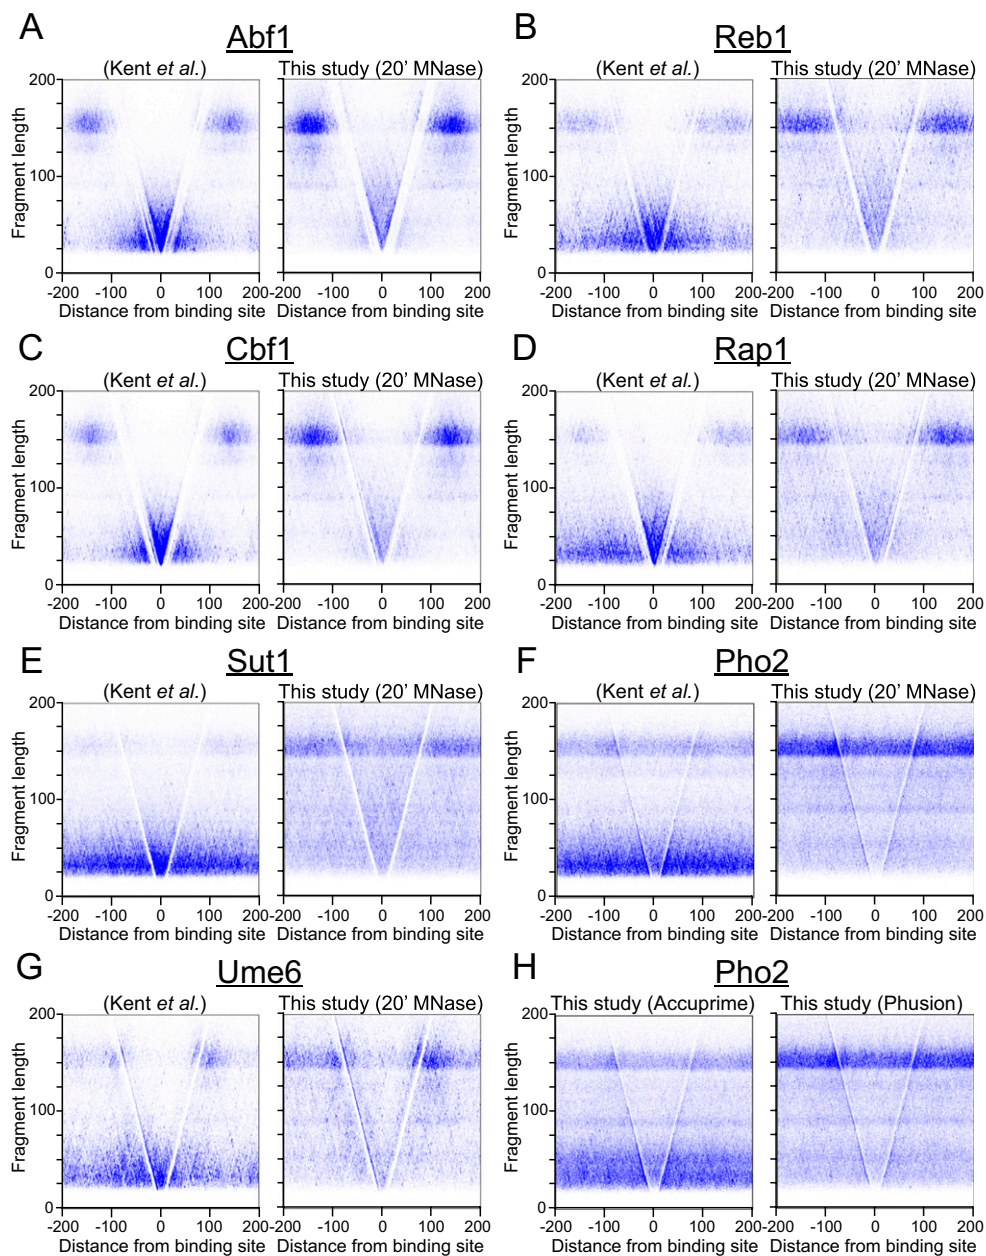

**Fig. S6.** V-plot displays using sequence datasets with different fragment size distributions. (A–G) Paired-end sequencing data from MNase-digested yeast nuclei described by Kent et al. (1) were obtained from the GEO Short Read Archive (SRA020615.3) and aligned to the yeast genome. V-plots for this dataset are shown together with the 20 min V-plots for the transcription factors highlighted in the text. In this study, 10  $\mu$ g of DNA derived from MNase-treated chromatin DNA obtained from pooled cultures was used to construct standard Illumina libraries. Note that similar features are evident in this dataset as in the current study. Equal numbers of reads were used to construct each V-plot pair. (H) Efficiency of PCR amplification affects the size distribution of sequenced fragments. An adapter-linked sample derived from the 20-min MNase digestion sample was split into two equal aliquots after removal of adapters with Ampure beads. One aliquot was amplified with Accuprime DNA Polymerase (Invitrogen) and the other half with Phusion DNA Polymerase (New England Biolabs) to generate sequencing libraries. The size distribution of the Accuprime library closely matched that of the Kent et al. (1) dataset, as is evident from a comparison of the Pho2 V-plots with those in F.

1. Kent NA, Adams S, Moorhouse A, Paszkiewicz K (2011) Chromatin particle spectrum analysis: A method for comparative chromatin structure analysis using paired-end mode next-generation DNA sequencing. *Nucleic Acids Res* 39:e26.















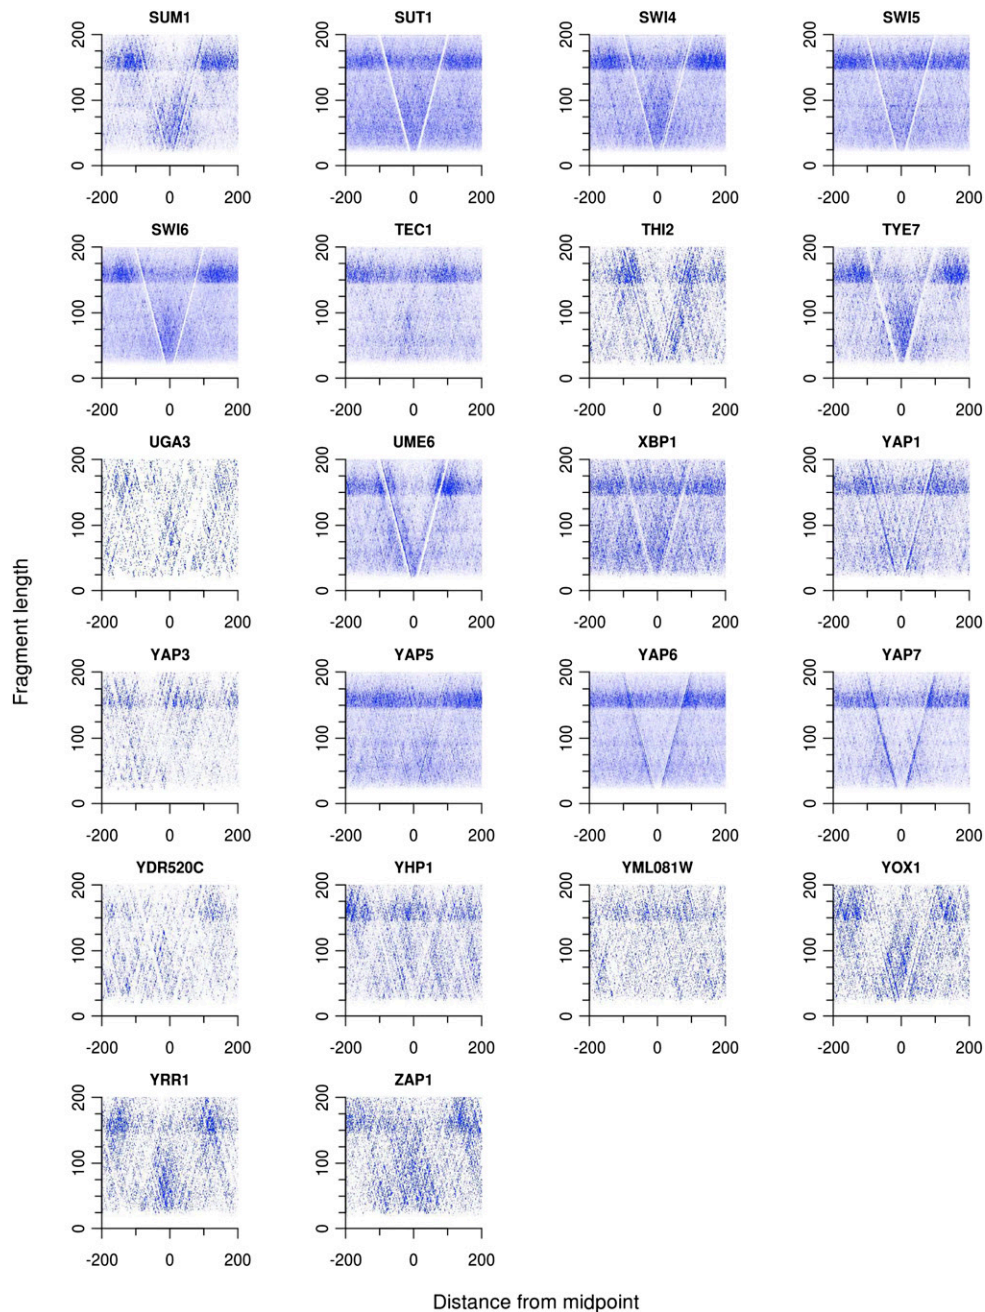

**Fig. S8.** Comprehensive V-plots for 118 transcription factors. See Figs. 4 and 5 for selected examples drawn from this full set. We attribute the lack of Vs in many of the V-plots to technical limitations, insofar as the binding site identifications were obtained by using a greedy algorithm together with conservation information to find consensus sequences within low-resolution ChIP data (1). The sites that give clear V patterns are most likely those for which the algorithm succeeded, and those without a V might have been more challenging. These 118 transcription factors are the only ones for which the algorithm succeeded in finding a consensus sequence, and so it is likely that many other consensus sequences are too weak for accurate predictions to be made. For example, the AZF1 consensus is TTTTCTT, and might well have been spurious, identifying T-rich regions, which are common in the yeast genome near promoters, but which might indicate specific AZF1 binding.

1. Maclsaac KD, et al. (2006) An improved map of conserved regulatory sites for *Saccharomyces cerevisiae*. *BMC Bioinformatics* 7:113.



**Table S1. Summary statistics of MNase-protected fragments spanning transcription factor binding-site midpoints**

| Transcription factor | MNase (min) | Number  | Fragment length | SD     | Distance | SD     | Nucleosome positioning |
|----------------------|-------------|---------|-----------------|--------|----------|--------|------------------------|
| Abf1                 | 2.5'        | 781290  | 141.809         | 83.65  | 0.575    | 49.059 | Strong                 |
|                      | 20'         | 310097  | 116.879         | 69.009 | 2.255    | 42.149 |                        |
| Aft2                 | 2.5'        | 379596  | 182.881         | 86.713 | 1.861    | 58.18  | Weak                   |
|                      | 20'         | 261834  | 152.232         | 66.797 | 2.071    | 49.232 |                        |
| Cbf1                 | 2.5'        | 417751  | 166.836         | 88.075 | -2.994   | 55.286 | Moderate to strong     |
|                      | 20'         | 231094  | 135.176         | 70.354 | -2.777   | 47.554 |                        |
| Cin5                 | 2.5'        | 362352  | 183.676         | 85.242 | 0.108    | 60.151 | Very weak              |
|                      | 20'         | 229066  | 156.048         | 62.582 | 0.305    | 48.76  |                        |
| Dig1                 | 2.5'        | 928089  | 178.718         | 86.532 | -1.048   | 58.878 | Weak                   |
|                      | 20'         | 609343  | 151.377         | 65.191 | -0.16    | 49.295 |                        |
| Fhl1                 | 2.5'        | 346483  | 156.699         | 86.926 | 4.244    | 53.67  | Strong, asymmetric     |
|                      | 20'         | 141788  | 121.371         | 68.036 | -0.031   | 42.706 |                        |
| Fkh1                 | 2.5'        | 330019  | 173.677         | 87.16  | -7.089   | 60.773 | Moderate, asymmetric   |
|                      | 20'         | 168828  | 151.376         | 65.103 | -6.927   | 50.849 |                        |
| Gcn4                 | 2.5'        | 444519  | 171.324         | 87.613 | 1.875    | 59.034 | Moderate, asymmetric   |
|                      | 20'         | 254169  | 143.948         | 67.881 | 1.865    | 49.82  |                        |
| Mbp1                 | 2.5'        | 578283  | 161.574         | 90.481 | 0.003    | 57.855 | Strong                 |
|                      | 20'         | 14001   | 127.595         | 72.714 | -1.296   | 46.2   |                        |
| Mcm1                 | 2.5'        | 135952  | 169.655         | 87.654 | -3.398   | 54.037 | Moderate to strong     |
|                      | 20'         | 81551   | 133.426         | 66.991 | -1.352   | 42.783 |                        |
| Mot3                 | 2.5'        | 335304  | 183.53          | 86.379 | -1.818   | 60.213 | None                   |
|                      | 20'         | 235505  | 152.425         | 65.463 | -2.16    | 49.523 |                        |
| Msn2                 | 2.5'        | 603766  | 180.469         | 87.062 | -5.565   | 58.843 | Very weak              |
|                      | 20'         | 422441  | 147.265         | 66.377 | -5.144   | 48.549 |                        |
| Msn4                 | 2.5'        | 559720  | 179.545         | 86.746 | -7.347   | 58.977 | Very weak              |
|                      | 20'         | 387265  | 148.356         | 66.253 | -7.379   | 48.852 |                        |
| Nrg1                 | 2.5'        | 335427  | 180.739         | 87.949 | -0.412   | 59.839 | Weak                   |
|                      | 20'         | 223324  | 149.183         | 67.41  | -0.805   | 49.722 |                        |
| Phd1                 | 2.5'        | 932670  | 183.366         | 86.387 | -3.871   | 59.592 | Very weak              |
|                      | 20'         | 635875  | 150.334         | 65.445 | -3.568   | 48.754 |                        |
| Pho2                 | 2.5'        | 1211144 | 186.86          | 86.34  | -0.943   | 60.292 | Very weak              |
|                      | 20'         | 840056  | 157.879         | 63.469 | -0.707   | 49.587 |                        |
| Rap1                 | 2.5'        | 517151  | 161.193         | 87.911 | -2.472   | 55.124 | Moderate to strong     |
|                      | 20'         | 232901  | 129.079         | 69.223 | -0.286   | 44.756 |                        |
| Reb1                 | 2.5'        | 657354  | 143.099         | 86.685 | -4.457   | 53.365 | Strong                 |
|                      | 20'         | 260869  | 124.073         | 71.246 | -6.973   | 46.741 |                        |
| Rpn4                 | 2.5'        | 152676  | 159.734         | 87.828 | 4.121    | 57.493 | Moderate, asymmetric   |
|                      | 20'         | 80728   | 136.475         | 70.409 | 2.752    | 50.668 |                        |
| Skn7                 | 2.5'        | 582884  | 183.481         | 87.556 | 1.192    | 57.751 | Weak                   |
|                      | 20'         | 410176  | 146.218         | 67.242 | 0.959    | 46.701 |                        |
| Sok2                 | 2.5'        | 703896  | 183.232         | 86.856 | -3.472   | 59.386 | Very weak              |
|                      | 20'         | 477289  | 150.013         | 66.28  | -3.376   | 48.755 |                        |
| Ste12                | 2.5'        | 860405  | 180.615         | 86.482 | -1.213   | 59.269 | Very weak              |
|                      | 20'         | 569296  | 152.301         | 64.778 | -1.175   | 49.423 |                        |
| Sut1                 | 2.5'        | 674817  | 185.516         | 87.774 | -0.399   | 58.513 | Very weak              |
|                      | 20'         | 484782  | 146.494         | 67.151 | -0.141   | 46.936 |                        |
| Swi4                 | 2.5'        | 553035  | 177.865         | 88.19  | 0.042    | 58.017 | Weak                   |
|                      | 20'         | 353482  | 143.57          | 67.549 | -0.493   | 47.49  |                        |
| Swi6                 | 2.5'        | 688475  | 175.909         | 89.016 | -1.812   | 58.302 | Moderate               |
|                      | 20'         | 429072  | 143.678         | 67.963 | -2.077   | 47.448 |                        |
| Tye7                 | 2.5'        | 150165  | 166.8           | 88.059 | -1.867   | 55.292 | Moderate               |
|                      | 20'         | 84823   | 137.741         | 69.326 | -1.433   | 48.204 |                        |
| Ume6                 | 2.5'        | 287827  | 179.665         | 90.632 | -2.318   | 64.331 | Moderate, asymmetric   |
|                      | 20'         | 192830  | 148.801         | 69.749 | -2.114   | 54.289 |                        |
| Yap5                 | 2.5'        | 360987  | 176.617         | 84.94  | -3.07    | 59.207 | None                   |
|                      | 20'         | 221289  | 150.787         | 64.228 | -2.521   | 49.373 |                        |
| Yap6                 | 2.5'        | 434494  | 183.852         | 85.33  | -0.123   | 60.723 | Very weak              |
|                      | 20'         | 276176  | 156.78          | 63.435 | -0.59    | 49.825 |                        |

Fragment lengths and distance of each fragment midpoint from the center of each binding site motif for each dataset are included.
